# Supplementary material for: High-Throughput In Vitro, Ex Vivo, and In Vivo Screen of Adeno-Associated Virus Vectors Based on Physical and Functional Transduction
Source: PubMed Central journal article supplement — Hum Gene Ther. 2020 May 8;31(9-10):575–89. doi: 10.1089/hum.2019.264 (PMC7232709; doi:10.1089/hum.2019.264), 2020-05-08
Supplement: Supp_Fig_S1.pdf [file Supp_Fig_S1.pdf]

**Supplementary Figure S1.** Detailed analysis of vector titer and NGS data. Individual data points from Figures 1C, 2C, D, 4C, D and 5C, D are shown. The medians and the interquartile ranges are shown. **(A)** *Left-Y-axis:* Pre- and postdilution titers of the individual AAV vector preparations (from Figure 1C, upper panel). *Right-Y-axis:* Distribution of AAV variants within the mixed AAV Testing Kit based on NGS results (from Fig. 1C, lower panel). **(B)** DNA and RNA NGS data from *in vitro* experiments (from Fig. 2C, D). **(C)** DNA and RNA data from naïve FRG mouse (from Fig. 4C, D). **(D)** DNA and RNA from humanized FRG mouse (from Fig. 5C, D). AAV, adeno-associated virus; NGS, next-generation sequencing.
