# Supplementary material for: High-Throughput In Vitro, Ex Vivo, and In Vivo Screen of Adeno-Associated Virus Vectors Based on Physical and Functional Transduction
Source: PubMed Central journal article supplement — Hum Gene Ther. 2020 May 8;31(9-10):575–89. doi: 10.1089/hum.2019.264 (PMC7232709; doi:10.1089/hum.2019.264), 2020-05-08
Supplement: Supp_Table_S1-S2.pdf [file Supp_Table_S1-S2.pdf]

## Supplementary Data

**Supplementary Table S1.** Adeno-associated virus variants and assigned barcodes

| No. | Capsid Variant | Six Nucleotide Barcode ( $N_6BC$ ) |
|-----|----------------|------------------------------------|
| 1   | AAV1           | AAAATT                             |
| 2   | AAV2           | AAAGAC                             |
| 3   | AAV3b          | AGATTA                             |
| 4   | AAV4           | ACCTTT                             |
| 5   | AAV5           | ACCAAA                             |
| 6   | AAV6           | AATTCC                             |
| 7   | AAV7           | CTCGTG                             |
| 8   | AAV8           | AAATAT                             |
| 9   | AAV9           | CATATG                             |
| 10  | AAV10          | TCAACC                             |
| 11  | AAV11          | TGTTTC                             |
| 12  | AAV12          | TCATCC                             |
| 13  | AAV13          | ACGGCT                             |
| 14  | AAVrh10        | CGGCAC                             |
| 15  | AAVDJ          | CTCCCG                             |
| 16  | AAVDJ/8        | CCTCCG                             |
| 17  | AAVLK01        | CTGTCC                             |
| 18  | AAVLK02        | GGCACG                             |
| 19  | AAVLK03        | CGCGAC                             |
| 20  | AAVLK19        | ACCCAG                             |
| 21  | AAVNP22        | ACAAAA                             |
| 22  | AAVNP40        | TGATGT                             |
| 23  | AAVNP59        | TAAGGT                             |
| 24  | AAVNP66        | ATTGCT                             |
| 25  | AAVNP94        | AAACGA                             |
| 26  | AAV7m8         | TGCTTT                             |
| 27  | AAVAnc80       | CAGGGA                             |
| 28  | AAVPHP.eB      | CTTACT                             |
| 29  | AAV2i8         | TTTGTT                             |
| 30  | AAV2retro      | CAGGAG                             |

AAV, adeno-associated virus.

**Supplementary Table S2.** Next-generation sequencing read counts for each sample

| Experiment             | Sample                                        | Read Counts     |         |
|------------------------|-----------------------------------------------|-----------------|---------|
| AAV Testing Kit        | AAV Testing Kit                               | 1710391         |         |
|                        | Immortalized cell lines, primary cells, iPSCs | HEK293T DNA     | 4084782 |
|                        |                                               | HEK293T RNA     | 2877442 |
|                        |                                               | HeLa DNA        | 3075522 |
|                        |                                               | HeLa RNA        | 3511265 |
|                        |                                               | HuH-7 DNA       | 2772365 |
|                        |                                               | HuH-7 RNA       | 3169469 |
|                        |                                               | T cell DNA      | 3460526 |
|                        |                                               | T cell RNA      | 3391895 |
|                        |                                               | Fibroblast DNA  | 3837633 |
|                        |                                               | Fibroblast RNA  | 5029822 |
|                        | iPSC DNA                                      | 4008496         |         |
|                        | iPSC RNA                                      | 5119096         |         |
| Nonhumanized FRG mouse | Liver DNA                                     | 4671634         |         |
|                        | Liver RNA                                     | 4063961         |         |
|                        | Brain DNA                                     | 464495          |         |
|                        | Brain RNA                                     | 494744          |         |
|                        | Heart DNA                                     | 455301          |         |
|                        | Heart RNA                                     | 569603          |         |
|                        | Lung DNA                                      | 401605          |         |
|                        | Lung RNA                                      | 430749          |         |
|                        | Spleen DNA                                    | 439382          |         |
|                        | Spleen RNA                                    | 402438          |         |
|                        | Kidney DNA                                    | 395052          |         |
|                        | Kidney RNA                                    | 333875          |         |
|                        | Skeletal muscle DNA                           | 329627          |         |
|                        | Skeletal muscle RNA                           | 331030          |         |
|                        | Smooth muscle DNA                             | 372909          |         |
|                        | Smooth muscle RNA                             | 218869          |         |
|                        | Humanized FRG mouse                           | Human liver DNA | 4880511 |
| Human liver RNA        |                                               | 3325766         |         |
| Mouse liver DNA        |                                               | 4253675         |         |
| Mouse liver RNA        |                                               | 3218491         |         |
| Brain DNA              |                                               | 392023          |         |
| Brain RNA              |                                               | 282005          |         |
| Heart DNA              |                                               | 367533          |         |
| Heart RNA              |                                               | 529112          |         |
| Lung DNA               |                                               | 463459          |         |
| Lung RNA               |                                               | 522590          |         |
| Spleen DNA             |                                               | 251615          |         |
| Spleen RNA             |                                               | 623892          |         |
| Kidney DNA             |                                               | 420265          |         |
| Kidney RNA             | 629129                                        |                 |         |
| Skeletal muscle DNA    | 378774                                        |                 |         |
| Skeletal muscle RNA    | 355439                                        |                 |         |
| Smooth muscle DNA      | 401062                                        |                 |         |
| Smooth muscle RNA      | 50232                                         |                 |         |
